# Supplementary material for: Edge-strand of BepA interacts with immature LptD on the β-barrel assembly machine to direct it to on- and off-pathways
Source: eLife journal article supplement (doi:10.7554/elife.70541), 2021-08-31
Supplement: fig2-data1 [file elife-70541-fig2-data1-v2.zip]

# Figure 2-Source Data

Figure 2A

Peri  $\alpha$ His

Original image

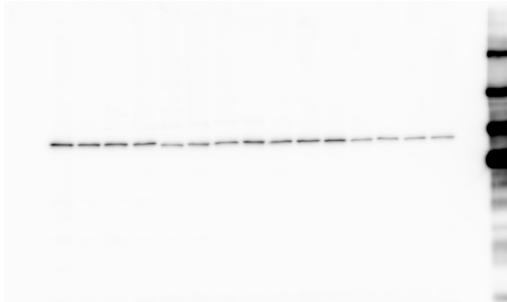

Used area

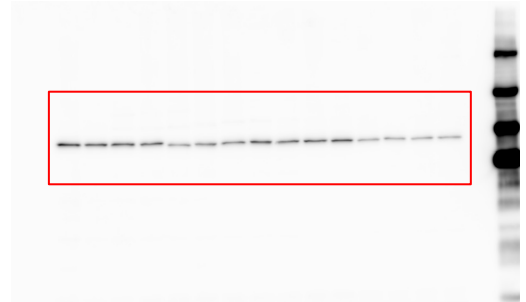

Peri  $\alpha$ BepA

Original image

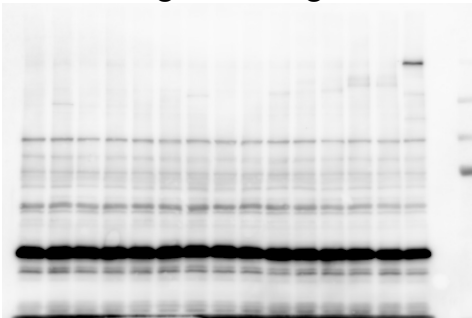

Used area

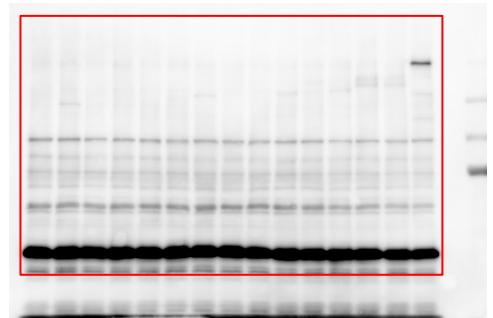

$\beta$ -N  $\alpha$ His

Original image

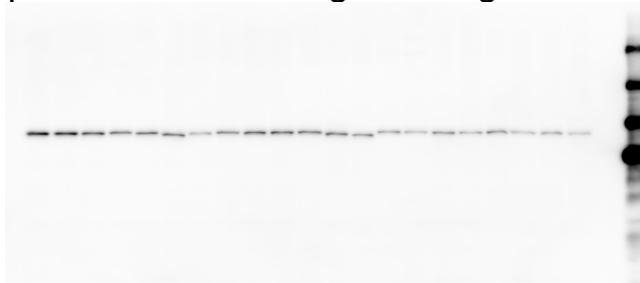

Used area

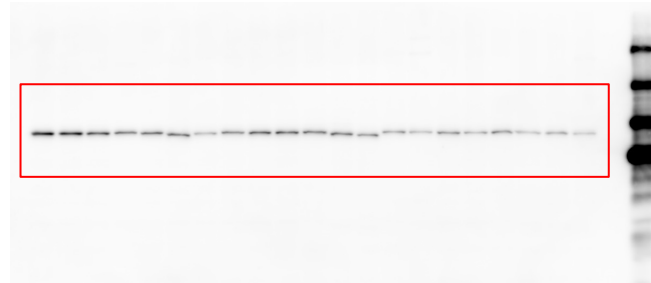

$\beta$ -N  $\alpha$ BepA

Original image

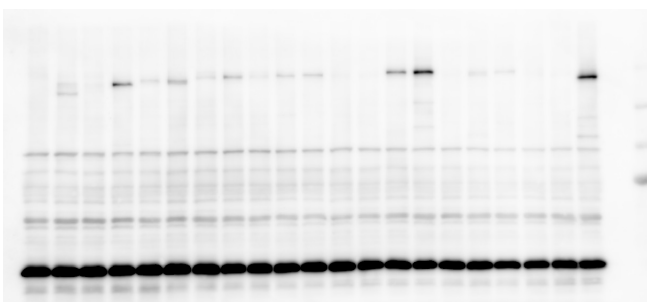

Used area

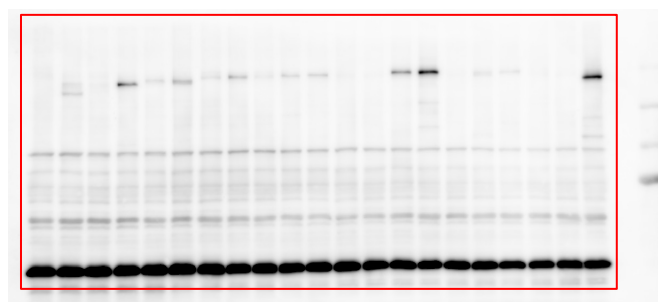

## Figure 2-Source Data

$\beta$ -C  $\alpha$ His

Original image

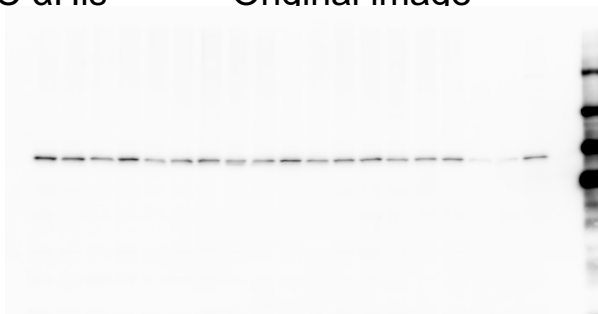

Used area

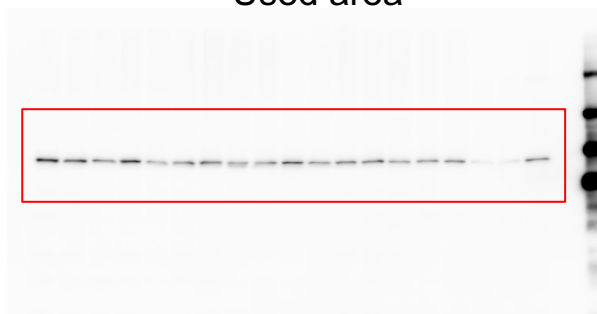

$\beta$ -C  $\alpha$ BepA

Original image

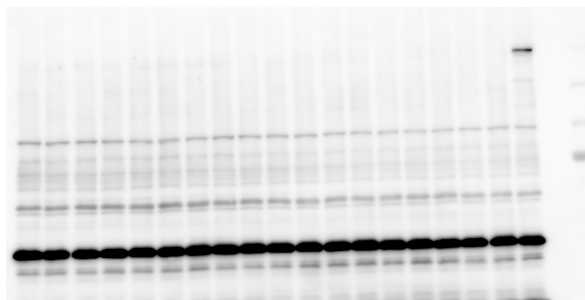

Used area

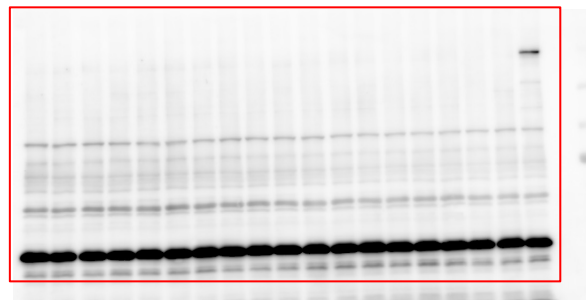

## Figure 2B

$\alpha$ His

Original image

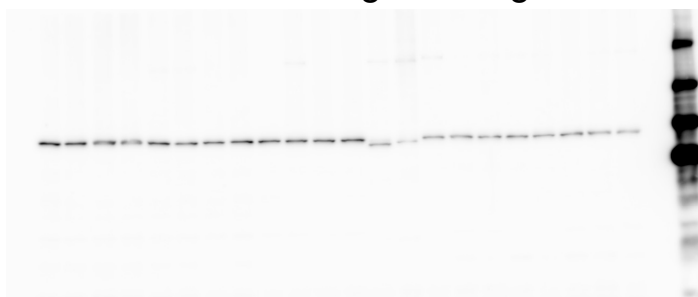

Used area

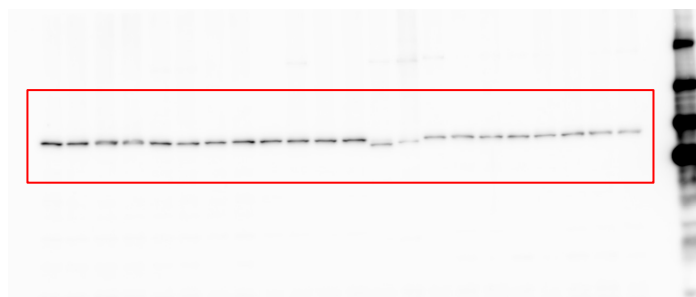

$\alpha$ BepA

Original image

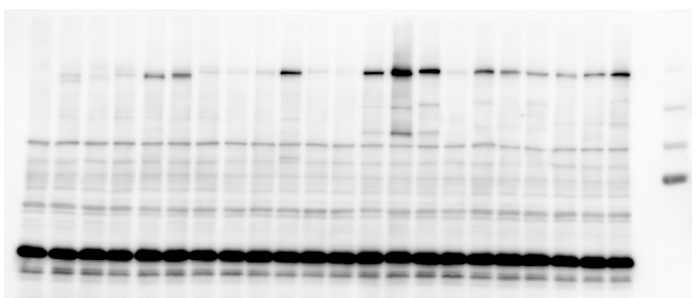

Used area

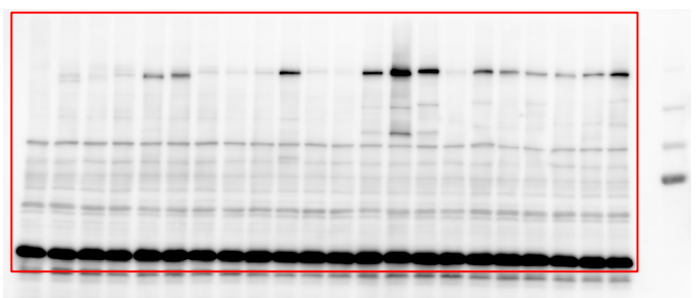

The "original" images were constructed by the image processing (including rotation, flip, contrast adjusting, and/or cropping) of the corresponding raw data.
