# Supplementary material for: Edge-strand of BepA interacts with immature LptD on the β-barrel assembly machine to direct it to on- and off-pathways
Source: eLife journal article supplement (doi:10.7554/elife.70541), 2021-08-31
Supplement: fig2-figsupp1-data1 [file Figure 2-figure supplement 1-Source data 1 (used area).pdf.pdf › Figure 2-figure supplment 1 Source data files/Figure 2-figure supplement 1-Source data 1 (used area).pdf.pdf]

# Figure 2-figure supplement 1-Source Data

$\alpha$ LptD

Original image

Used area

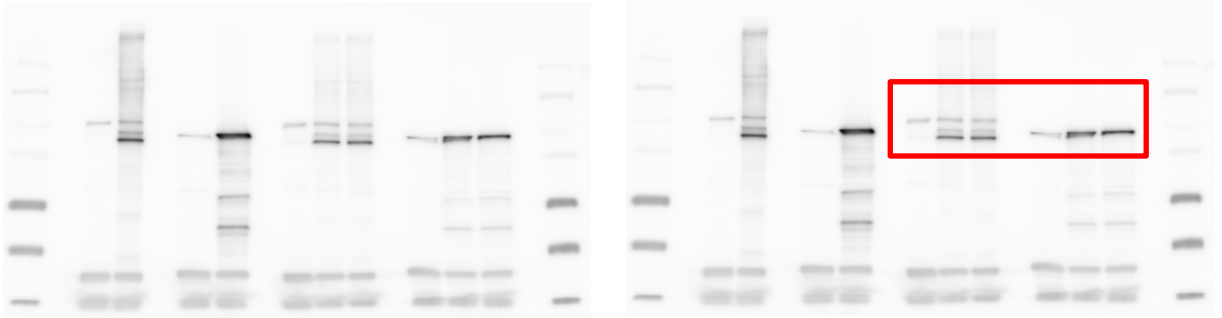

$\alpha$ His

Original image

Used area

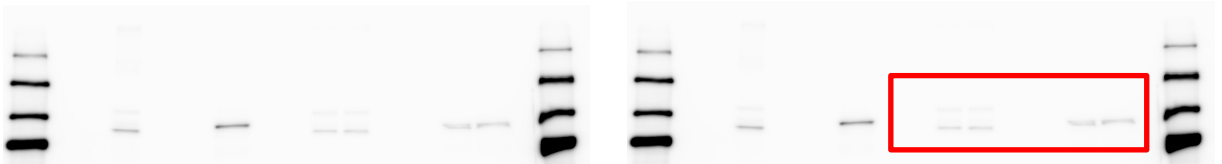

$\alpha$ BepA

Original image

Used area

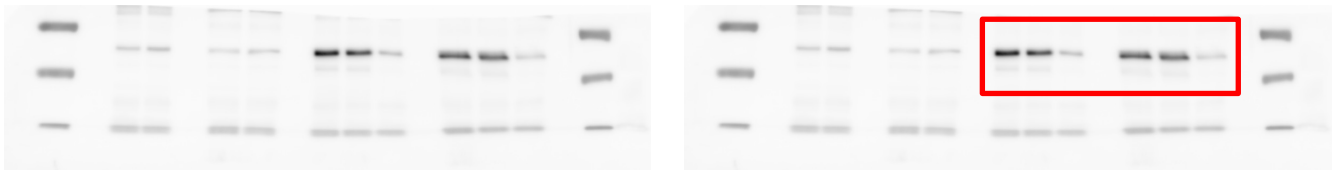

The "original" images were constructed by the image processing (including rotation, flip, contrast adjusting, and/or cropping) of the corresponding raw data.
