# Supplementary material for: Edge-strand of BepA interacts with immature LptD on the β-barrel assembly machine to direct it to on- and off-pathways
Source: eLife journal article supplement (doi:10.7554/elife.70541), 2021-08-31
Supplement: fig3-figsupp1-data1 [file Figure 3-figure supplement 1-Source data 1 (used area).pdf.pdf › Figure 3-figure supplment 1 Source data files/Figure 3-figure supplement 1-Source data 1 (used area).pdf.pdf]

# Figure 3-figure supplement 1-Source Data

$\alpha$ BepA pure A106/F107

Original image

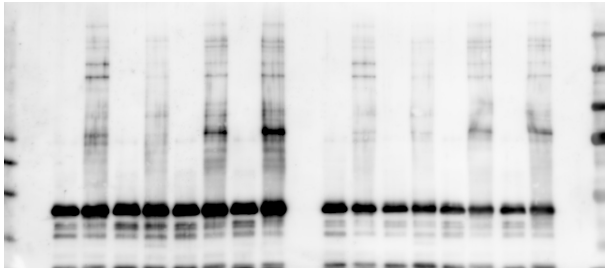

Used area

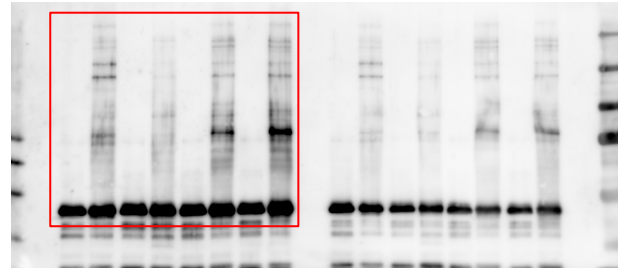

$\alpha$ LptD pure A106/F107

Original image

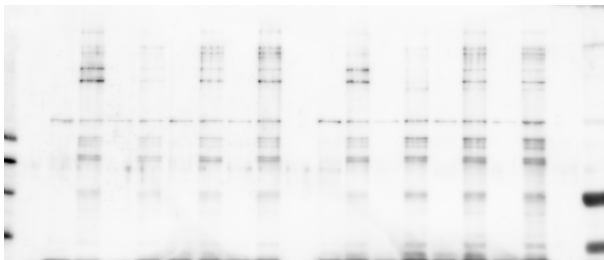

Used area

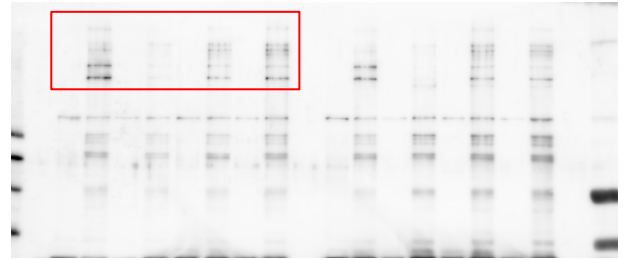

$\alpha$ BepA pure N105

Original image

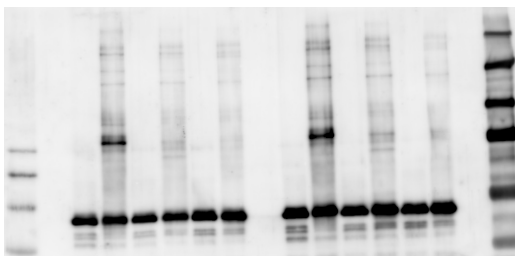

Used area

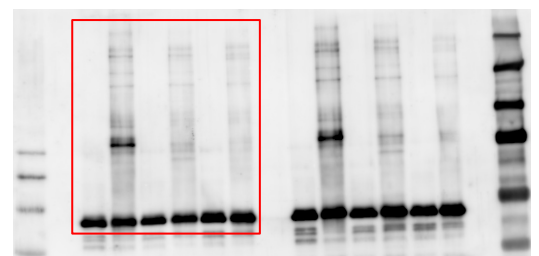

$\alpha$ LptD pure N105

Original image

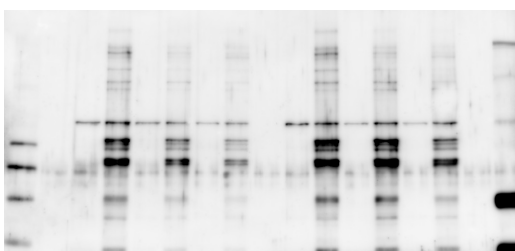

Used area

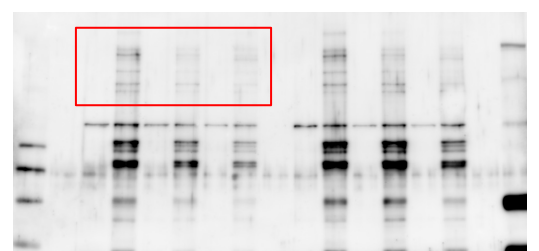

# Figure 3-figure supplement 1-Source Data

$\alpha$ BepA<sup>Whole A106/F107</sup>

Original image

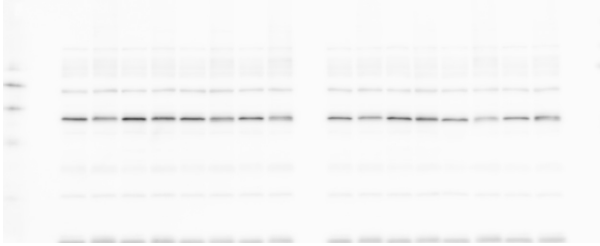

Used area

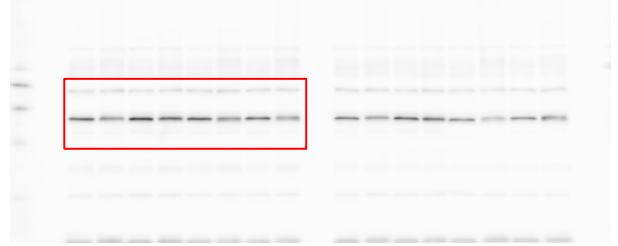

$\alpha$ BepA<sup>Whole N105</sup>

Original image

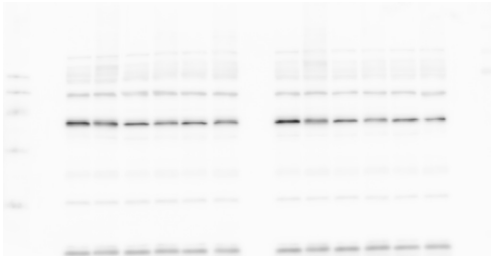

Used area

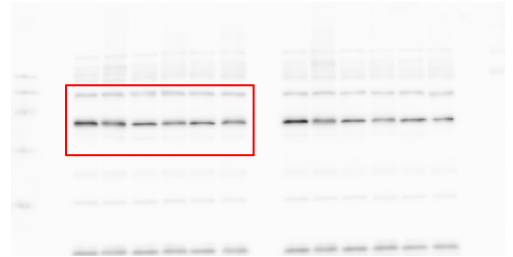

The "original" images were constructed by the image processing (including rotation, flip, contrast adjusting, and/or cropping) of the corresponding raw data.
