# Supplementary material for: Edge-strand of BepA interacts with immature LptD on the β-barrel assembly machine to direct it to on- and off-pathways
Source: eLife journal article supplement (doi:10.7554/elife.70541), 2021-08-31
Supplement: fig4-data1 [file Fig 4-Source data 1 (A, B, C,_used area).pdf › Figure 4 Source data files/Fig 4-Source data 1 (A, B, C,_used area).pdf]

# Figure 4-Source Data

Figure 4A

$\alpha$ BepA

Original image

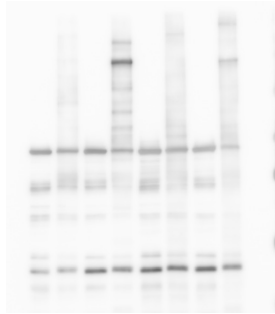

Used area

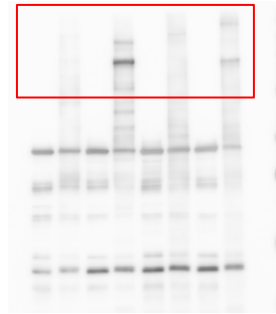

$\alpha$ BamA

Original image

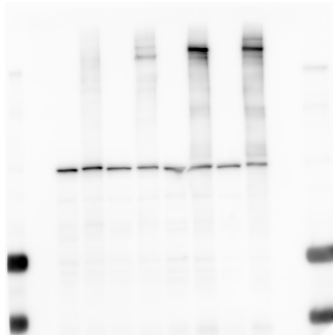

Used area

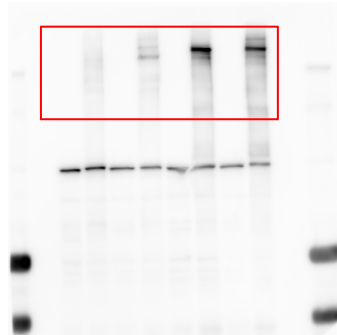

Figure 4B

$\alpha$ BepA

Original image

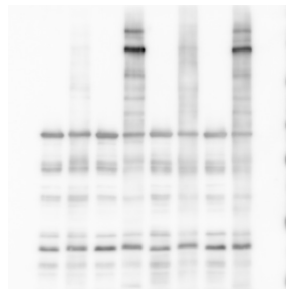

Used area

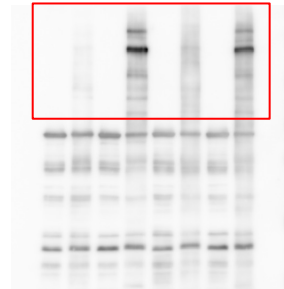

$\alpha$ BamD

Original image

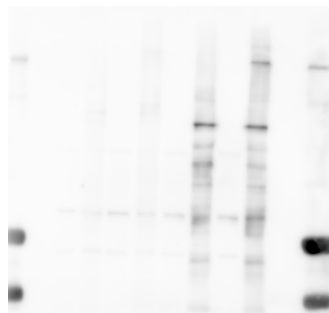

Used area

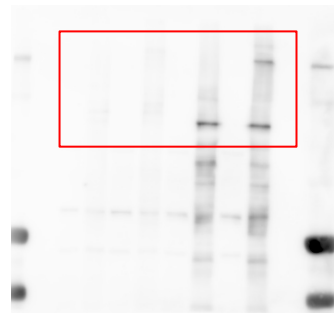

# Figure 4-Source Data

Figure 4C

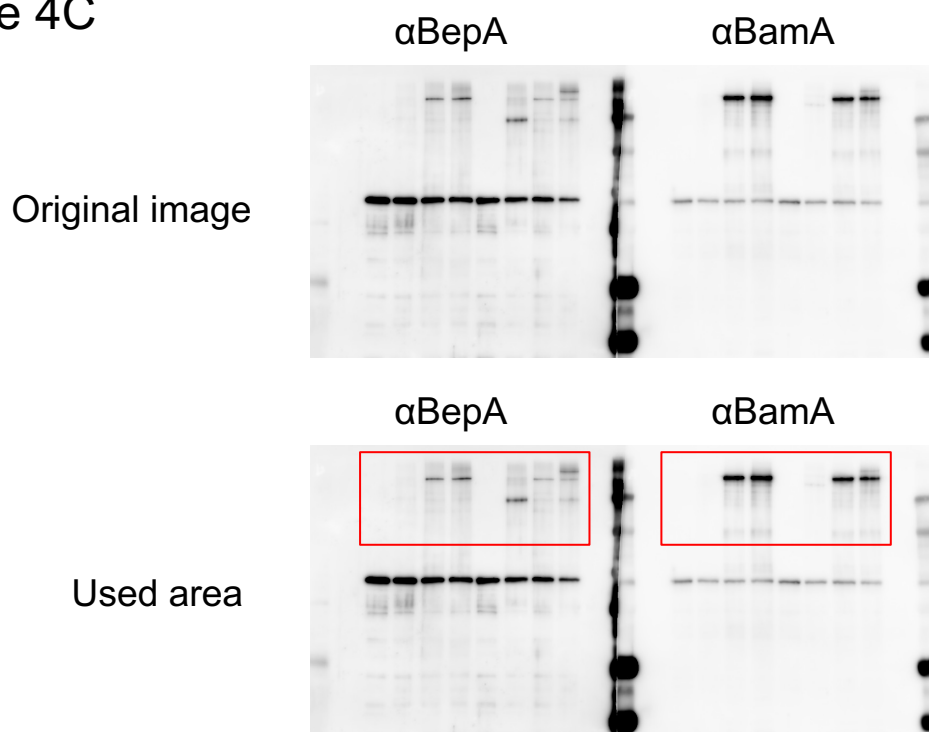

The "original" images were constructed by the image processing (including rotation, flip, contrast adjusting, and/or cropping) of the corresponding raw data.
