# Supplementary material for: Edge-strand of BepA interacts with immature LptD on the β-barrel assembly machine to direct it to on- and off-pathways
Source: eLife journal article supplement (doi:10.7554/elife.70541), 2021-08-31
Supplement: fig4-figsupp3-data1 [file Figure 4-figure supplement 3-Source data 1 (A, B, C_used area).pdf.pdf › Figure 4-figure supplment 3 Source data files/Figure 4-figure supplement 3-Source data 1 (A, B, C_used area).pdf.pdf]

# Figure 4-figure supplement 3-Source Data

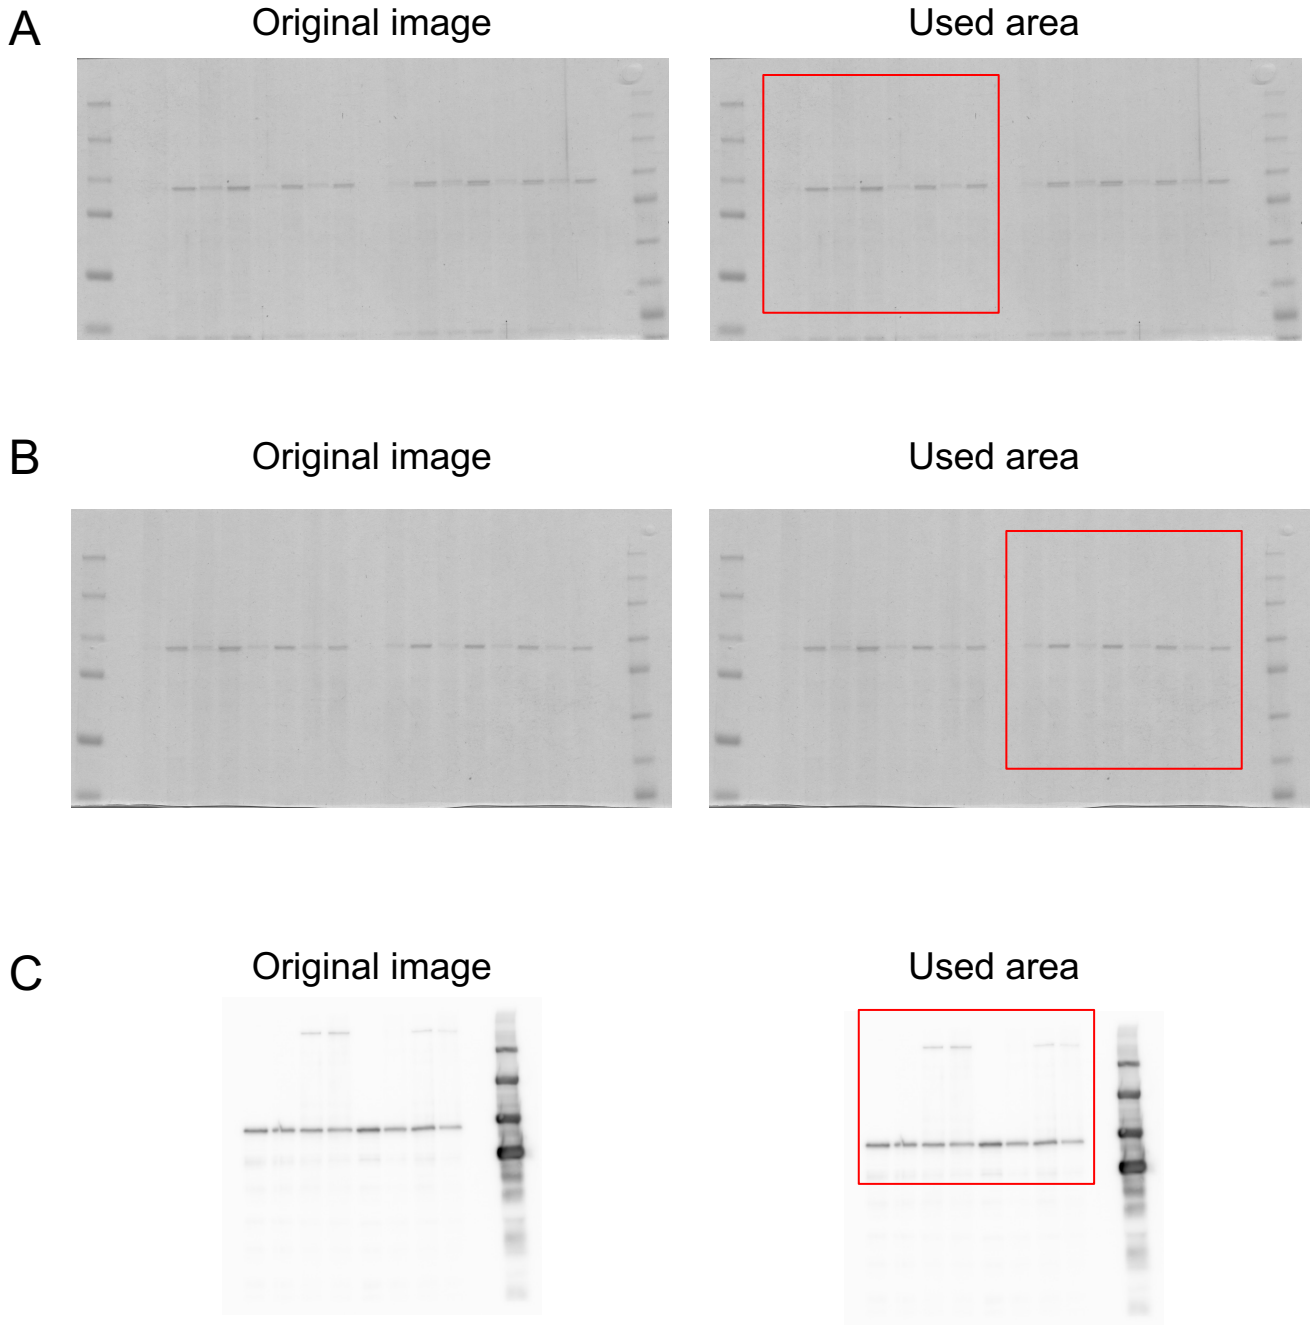

The "original" images were constructed by the image processing (including rotation, flip, contrast adjusting, and/or cropping) of the corresponding raw data.
